# Supplementary material for: Network pharmacology study on the mechanism of traditional Chinese medicine for upper respiratory tract infection
Source: Royal Society of Chemistry journal article supplement (doi:10.1039/c4mb00164h), 2014-06-04
Supplement: c4mb00164h1.pdf [file c4mb00164h1.pdf]

### Electronic Supplementary Information

Network Pharmacology Study on Mechanism of Traditional Chinese Medicine for  
Upper Respiratory Tract Infection

Xinzhuang Zhang,<sup>a</sup> Jiangyong Gu,<sup>b</sup> Liang Cao,<sup>a</sup> Na Li,<sup>a</sup> Yiming Ma,<sup>a</sup> Zhenzhen Su,<sup>a</sup>  
Gang Ding,<sup>a</sup> Lirong Chen,<sup>\*b</sup> Xiaojie Xu,<sup>\*b</sup> Wei Xiao<sup>\*a</sup>

<sup>a</sup> State Key Laboratory of New-tech for Chinese Medicine Pharmaceutical Process, Kanion Pharmaceutical Corporation, Lianyungang City 222002, P.R.China.

<sup>b</sup> Beijing National Laboratory for Molecular Sciences (BNLMS), State Key Laboratory of Rare Earth Materials Chemistry and Applications, College of Chemistry and Molecular Engineering, Peking University, Beijing 100871, P.R. China

The supplementary information has five tables: Table S1 and Table S2 list the information of both 46 molecules in RDN and 45 target proteins related to URTIs for molecular docking. Table S3 and Table S4 list the two topological parameters (degree and betweenness) of the nodes (molecules or target proteins) in DTN, DDN and TTN. The relationship between target protein and diseases in TTD, as well as the classification of the diseases are listed in Table S5.

**Table S1 46 molecules contained in RDN**

| <b>index</b> | <b>CAS_NO.</b> | <b>UNPD ID <sup>a</sup></b> | <b>Chemical_Name</b>                                     |
|--------------|----------------|-----------------------------|----------------------------------------------------------|
| 1            | 14965-20-9     | UNPD186030                  | Chrysosplenol-D                                          |
| 2            | 537-98-4       | UNPD12047                   | (E)-ferulic acid                                         |
| 3            | 1014-83-1      | UNPD142498                  | (Z)-ferulic acid                                         |
| 4            | 114653-46-2    | UNPD125055                  | 6"-p-coumaroyl genipin gentiobioside                     |
| 5            | 63968-64-9     | UNPD189689                  | Artemisinin                                              |
| 6            | 546-49-6       | UNPD102035                  | Artemisia ketone                                         |
| 7            | 331-39-5       | UNPD133665                  | Caffeic acid                                             |
| 8            | 76-22-2        | UNPD59933                   | Camphor                                                  |
| 9            | 479-91-4       | UNPD186353                  | Casticine                                                |
| 10           | 327-97-9       | UNPD106185                  | chlorogenic acid                                         |
| 11           | 470-82-6       | UNPD63596                   | Cineole                                                  |
| 12           | 91-64-5        | UNPD21132                   | Coumarin                                                 |
| 13           | 82638-22-0     | UNPD164733                  | 3alpha,5alpha-dihydroxy-4alpha-O-caffeoylq<br>Uinic acid |
| 14           | 5373-11-5      | UNPD51223                   | Luteoloside                                              |
| 15           | 19587-65-6     | UNPD135322                  | Eupatin                                                  |
| 16           | 470-08-6       | UNPD22238                   | (+)-beta-fenchol                                         |
| 17           | 1632-73-1      | UNPD26605                   | (-)-beta-fenchol                                         |
| 18           | 4695-62-9      | UNPD30210                   | (-)-alpha-fenchol                                        |
| 19           | 2217-2-9       | UNPD7069                    | (+)-alpha-fenchol                                        |
| 20           | 1135-24-6      | UNPD168255                  | 3-O-methyl caffeic acid                                  |
| 21           | 6902-77-8      | UNPD70448                   | Genipin                                                  |
| 22           | 29307-60-6     | UNPD158162                  | Genipin-1-beta-gentiobioside                             |
| 23           | 27741-01-1     | UNPD106583                  | Geniposidinsaeure                                        |
| 24           | 106-24-1       | UNPD171634                  | Geraniol                                                 |
| 25           | 482-36-0       | UNPD127168                  | Hyperoside                                               |
| 26           | 89919-61-9     | UNPD101522                  | Isochlorogenic acid A                                    |
| 27           | 17912-89-9     | UNPD13564                   | 4,5-di-O-caffeoylquinic acid                             |
| 28           | 480-19-3       | UNPD60650                   | Isorhamnetin                                             |
| 29           | 78-70-6        | UNPD106513                  | (3R)-()-Linalool                                         |
| 30           | 126-90-9       | UNPD139439                  | (3S)-()-Linalool                                         |
| 31           | 491-70-3       | UNPD149880                  | Luteolin                                                 |
| 32           | 906-33-2       | UNPD129293                  | neochlorogenic acid                                      |

|    |             |            |                                    |
|----|-------------|------------|------------------------------------|
| 33 | 99-50-3     | UNPD60430  | Protocatechuic acid                |
| 34 | 117-39-5    | UNPD49205  | Quercetin                          |
| 35 | 153-18-4    | UNPD150726 | Rutin                              |
| 36 | 69-72-7     | UNPD59192  | salicylic acid                     |
| 37 | 21149-19-9  | UNPD49553  | Santolina alcohol                  |
| 38 | 301-16-6    | UNPD130563 | Scoparin                           |
| 39 | 92-61-5     | UNPD123796 | Scopoetine                         |
| 40 | 22864-93-3  | UNPD138269 | Secologansaeure                    |
| 41 | 58822-47-2  | UNPD26834  | Secoxyloganin                      |
| 42 | 60077-47-6  | UNPD86130  | 7-epi-vogeloside                   |
| 43 | 57378-72-0  | UNPD124411 | Isochlorogenic acid C              |
| 44 | 123372-74-7 | UNPD48475  | Methyl 4-O-caffeoylquinat          |
| 45 | 114637-83-1 | UNPD189327 | 4,5- <i>di-O</i> -caffeoylquinat   |
| 46 | 29708-87-0  | UNPD148585 | Methyl 5- <i>O</i> -caffeoylquinat |

<sup>a</sup> UNPD: universal natural product database, which was constructed by Xiao-Jie Xu professor et al ( <http://pkuxxj.pku.edu.cn/UNPD/> ).

**Table S2 45 proteins related to URTIs and their PDB entry**

| <b>Protein</b>           | <b>Protein_name</b>                          | <b>PDB code</b> | <b>Uniprot code</b> |
|--------------------------|----------------------------------------------|-----------------|---------------------|
| 3C proteases<br>(CVA16)  | 3C proteases (Polyprotein)                   | 3SJI            | C8CIL7              |
| 3C protease (EV71)       | 3C proteases (Polyprotein)                   | 3SJO            | E0WWC7              |
| RdRp (3D(pol))<br>(EV71) | RNA-dependent RNA<br>polymerase(Polyprotein) | 3N6M            | D3K0N8              |
| HA (infl A)              | Hemagglutinin                                | 3EYM            | P03437              |
| PB2 (infl A)             | Polymerase basic protein 2                   | 2VQZ            | P31345              |
| M2 (infl A)              | Matrix protein 2                             | 2RLF            | P63231              |
| NP (infl A)              | Nucleocapsid protein                         | 3RO5            | Q1K9H2              |
| PA (infl A)              | Polymerase acidic protein                    | 3HW4            | Q9Q0U9              |
| NA (infl A)              | Neuraminidase                                | 1XOE            | P03472              |
| NA (infl B)              | Neuraminidase                                | 1NSD            | P27907              |
| HN (PIV 3)               | Haemagglutinin-neuraminidase<br>Glycoprotein | 1V3E            | Q6WJ03              |
| 3C protease (HRV<br>A2)  | Type 2 rhinovirus 3C protease                | 1CQQ            | P04936              |
| VP1 (HRV 1A)             | Rhinovirus coat protein (Subunit<br>VP1)     | 2HWD            | P23008              |
| VP1 (HRV B14)            | Coat protein VP1                             | 1NCQ            | P03303              |

|                       |                                                               |      |        |
|-----------------------|---------------------------------------------------------------|------|--------|
| F protein (RSV)       | Fusion glycoprotein F0                                        | 3KPE | P03420 |
| PDE 4A                | cAMP-specific 3',5'-cyclic<br>Phosphodiesterase 4A            | 2QYK | P27815 |
| H1R                   | Histamine H1 receptor                                         | 3RZE | P35367 |
| PDE 4B                | cAMP-specific 3',5'-cyclic<br>Phosphodiesterase 4B            | 1XLX | Q07343 |
| PDE 4D                | cAMP-specific 3',5'-cyclic<br>Phosphodiesterase 4D            | 3G4K | Q08499 |
| COX-2                 | Prostaglandin G/H synthase 2                                  | 3LN1 | P35354 |
| COX-1                 | Prostaglandin G/H synthase 1                                  | 3N8X | P23219 |
| sPLA2                 | Phospholipase A2,membrane<br>associated                       | 1J1A | P14555 |
| Na, K-ATPase $\alpha$ | Sodium/potassium-transporting<br>ATPase subunit alpha-1       | 3N23 | P05024 |
| LSD1                  | Lysine-specific histone demethylase 1                         | 2Z3Y | O60341 |
| TNF- $\alpha$         | Tumor necrosis factor                                         | 2AZ5 | P01375 |
| eNOS                  | Endothelial Nitric-oxide synthase                             | 1M9M | P29474 |
| iNOS                  | Inducible Nitric oxide synthase                               | 4NOS | P35228 |
| CXCR4                 | C-X-C chemokine receptor type 4                               | 3ODU | P61073 |
| p38 MAPK              | Mitogen-activated protein kinase 12                           | 1KV1 | Q16539 |
| JNK2                  | Mitogen-activated protein kinase 9                            | 3NPC | P45984 |
| JNK1                  | Mitogen-activated protein kinase 8                            | 3ELJ | P45983 |
| JNK3                  | Mitogen-activated protein kinase 10                           | 3TTI | P53779 |
| ERK1                  | Mitogen-activated protein kinase 3                            | 2ZOQ | P27361 |
| ERK2                  | Mitogen-activated protein kinase 1                            | 1PME | P28482 |
| PIK3C3                | Phosphatidylinositol 3-kinase catalytic<br>subunit type 3     | 3LS8 | Q8NEB9 |
| PKC- $\beta$          | Protein kinase C beta type                                    | 2I0E | P05771 |
| PKC- $\alpha$         | Protein kinase C alpha type                                   | 3IW4 | P17252 |
| Caspase-3             | Caspase-3                                                     | 1GFW | P42574 |
| IRAK4                 | Interleukin-1 receptor-associated<br>kinase-4                 | 2NRU | Q9NWZ3 |
| SAH                   | Human S-adenosylhomocysteine<br>hydrolase                     | 1LI4 | P23526 |
| MEK1                  | Dual specificity mitogen-activated<br>protein kinase kinase 1 | 1S9J | Q02750 |
| mPGES-1               | Prostaglandin E synthase                                      | 3DWW | O14684 |
| OMP decarboxylase     | Orotidine 5'-monophosphate<br>decarboxylase                   | 1EIX | P08244 |

|        |                                          |      |        |
|--------|------------------------------------------|------|--------|
| IMPDH2 | Inosine-5'-monophosphate dehydrogenase 2 | 1NF7 | P12268 |
| IMPDH1 | Inosine-5'-monophosphate dehydrogenase 1 | 1JCN | P20839 |

**Table S3 the degree and betweenness of the molecules in the DDN and DTN**

| Molecules  | DTN         |        | Molecules  | DDN         |        |
|------------|-------------|--------|------------|-------------|--------|
|            | Betweenness | Degree |            | Betweenness | Degree |
| UNPD189689 | 0.428       | 24     | UNPD70448  | 0.308       | 16     |
| UNPD149880 | 0.165       | 14     | UNPD189689 | 0.158       | 21     |
| UNPD49205  | 0.055       | 8      | UNPD51223  | 0.132       | 18     |
| UNPD51223  | 0.133       | 8      | UNPD133665 | 0.065       | 10     |
| UNPD130563 | 0.054       | 7      | UNPD149880 | 0.045       | 16     |
| UNPD124411 | 0.044       | 6      | UNPD130563 | 0.031       | 14     |
| UNPD127168 | 0.024       | 5      | UNPD127168 | 0.029       | 14     |
| UNPD60650  | 0.017       | 5      | UNPD106583 | 0.026       | 14     |
| UNPD106583 | 0.014       | 4      | UNPD135322 | 0.025       | 12     |
| UNPD135322 | 0.021       | 4      | UNPD60650  | 0.022       | 9      |
| UNPD164733 | 0.012       | 4      | UNPD124411 | 0.021       | 16     |
| UNPD70448  | 0.197       | 4      | UNPD49205  | 0.017       | 14     |
| UNPD13564  | 0.009       | 3      | UNPD164733 | 0.015       | 10     |
| UNPD186353 | 0.007       | 3      | UNPD101522 | 0.006       | 12     |
| UNPD101522 | 0.002       | 2      | UNPD13564  | 0.004       | 9      |
| UNPD133665 | 0.029       | 2      | UNPD186353 | 0.003       | 8      |
| UNPD148585 | 0.001       | 2      | UNPD148585 | 0.003       | 9      |
| UNPD186030 | 0.001       | 2      | UNPD186030 | 0.001       | 10     |
| UNPD48475  | 0.001       | 2      | UNPD48475  | 0.000       | 6      |
| UNPD102035 | 0           | 1      | UNPD189327 | 0           | 1      |
| UNPD106185 | 0           | 1      | UNPD125055 | 0           | 7      |
| UNPD125055 | 0           | 1      | UNPD158162 | 0           | 5      |
| UNPD129293 | 0           | 1      | UNPD22238  | 0           | 8      |
| UNPD158162 | 0           | 1      | UNPD26605  | 0           | 8      |
| UNPD189327 | 0           | 1      | UNPD30210  | 0           | 8      |
| UNPD21132  | 0           | 1      | UNPD59933  | 0           | 8      |
| UNPD22238  | 0           | 1      | UNPD102035 | 0           | 8      |
| UNPD26605  | 0           | 1      | UNPD63596  | 0           | 8      |

|           |   |   |            |   |   |
|-----------|---|---|------------|---|---|
| UNPD30210 | 0 | 1 | UNPD7069   | 0 | 8 |
| UNPD59933 | 0 | 1 | UNPD21132  | 0 | 2 |
| UNPD63596 | 0 | 1 | UNPD129293 | 0 | 7 |
| UNPD7069  | 0 | 1 |            |   |   |

**Table S4 the degree and betweenness of the target proteins in the TTN and DTN**

| Protein | DTN         |        | Protein | TTN         |        |
|---------|-------------|--------|---------|-------------|--------|
|         | Betweenness | Degree |         | Betweenness | Degree |
| O14684  | 0.212       | 9      | P29474  | 0.039       | 30     |
| O60341  | 0.074       | 8      | P05771  | 0.038       | 31     |
| P14555  | 0.110       | 8      | P14555  | 0.038       | 29     |
| P29474  | 0.096       | 8      | O60341  | 0.036       | 31     |
| P17252  | 0.047       | 6      | P23219  | 0.028       | 27     |
| P23008  | 0.061       | 6      | P17252  | 0.026       | 30     |
| P23219  | 0.115       | 5      | P23008  | 0.021       | 30     |
| P35228  | 0.027       | 5      | Q02750  | 0.020       | 20     |
| P53779  | 0.027       | 5      | P35228  | 0.019       | 28     |
| Q16539  | 0.029       | 5      | P03437  | 0.016       | 29     |
| P03437  | 0.018       | 4      | P20839  | 0.016       | 29     |
| P05771  | 0.040       | 4      | P63231  | 0.015       | 26     |
| P35354  | 0.051       | 4      | Q9Q0U9  | 0.015       | 26     |
| Q02750  | 0.067       | 4      | Q16539  | 0.014       | 26     |
| P08244  | 0.069       | 3      | P35354  | 0.013       | 18     |
| P20839  | 0.009       | 3      | P05024  | 0.010       | 28     |
| P27815  | 0.008       | 3      | P28482  | 0.010       | 28     |
| P28482  | 0.008       | 3      | P45984  | 0.010       | 28     |
| Q9Q0U9  | 0.013       | 3      | P53779  | 0.008       | 25     |
| D3K0N8  | 0.002       | 2      | P08244  | 0.006       | 8      |
| P05024  | 0.004       | 2      | Q8NEB9  | 0.006       | 25     |
| P12268  | 0.002       | 2      | P12268  | 0.003       | 16     |
| P45984  | 0.004       | 2      | P27815  | 0.002       | 11     |
| P61073  | 0.030       | 2      | Q08499  | 0.001       | 24     |
| P63231  | 0.009       | 2      | O14684  | 0.001       | 4      |
| Q08499  | 0.004       | 2      | D3K0N8  | 0.000       | 7      |
| Q8NEB9  | 0.003       | 2      | P03472  | 0           | 13     |

|        |   |   |        |   |    |
|--------|---|---|--------|---|----|
| P01375 | 0 | 1 | P04936 | 0 | 5  |
| P03303 | 0 | 1 | P01375 | 0 | 23 |
| P03472 | 0 | 1 | P03303 | 0 | 23 |
| P04936 | 0 | 1 | P35367 | 0 | 7  |
| P23526 | 0 | 1 | P23526 | 0 | 13 |
| P31345 | 0 | 1 | Q07343 | 0 | 23 |
| P35367 | 0 | 1 | P61073 | 0 | 23 |
| Q07343 | 0 | 1 | Q9NWZ3 | 0 | 7  |
| Q1K9H2 | 0 | 1 | Q1K9H2 | 0 | 23 |
| Q9NWZ3 | 0 | 1 |        |   |    |

**Table S5 the relationship between potential targets and diseases from Therapeutic Target database, and the classification of diseases**

| Protein | Disease                  | Classification                   | Protein | Disease                | Classification |
|---------|--------------------------|----------------------------------|---------|------------------------|----------------|
| P29474  | Sepsis                   | Bacterial Infections and Mycoses | P35354  | Cancer                 | Neoplasms      |
| Q16539  | Endotoxemia              | Bacterial Infections and Mycoses | P35354  | Carcinoma in situ      | Neoplasms      |
| Q9NWZ3  | Sepsis                   | Bacterial Infections and Mycoses | P35354  | Colorectal cancer      | Neoplasms      |
| P01375  | Behcet's disease         | Cardiovascular Diseases          | P35354  | Lung cancer            | Neoplasms      |
| P01375  | Congestive heart failure | Cardiovascular Diseases          | P35354  | Meningioma             | Neoplasms      |
| P01375  | Heart failure            | Cardiovascular Diseases          | P35354  | Peutz-Jeghers syndrome | Neoplasms      |
| P05771  | Diabetic retinopathy     | Cardiovascular Diseases          | P35354  | Prostate cancer        | Neoplasms      |
| P14555  | Atherosclerosis          | Cardiovascular Diseases          | P35354  | Renal cell carcinoma   | Neoplasms      |
| P14555  | Coronary Artery Disease  | Cardiovascular Diseases          | P45984  | Cancer                 | Neoplasms      |
| P23219  | Cardiovascular disease   | Cardiovascular Diseases          | P61073  | Breast cancer          | Neoplasms      |
| P29474  | Cardiovascular disease   | Cardiovascular Diseases          | P61073  | Multiple Myeloma       | Neoplasms      |
| P29474  | Coronary                 | Cardiovascular                   | P61073  | Non-Hod                | Neoplasms      |

|        |                                     |                                                                             |        |                                                    |           |
|--------|-------------------------------------|-----------------------------------------------------------------------------|--------|----------------------------------------------------|-----------|
|        | Artery Disease                      | Diseases                                                                    |        | gkin's<br>Lymphom<br>a                             |           |
| P29474 | Hypertension                        | Cardiovascular<br>Diseases                                                  | P61073 | Ovarian<br>cancer                                  | Neoplasms |
| P35228 | Ischemia<br>reperfusion<br>injuries | Cardiovascular<br>Diseases                                                  | Q02750 | Breast<br>cancer                                   | Neoplasms |
| P35354 | Abdominal<br>aortic<br>aneurysm     | Cardiovascular<br>Diseases                                                  | Q02750 | Prostate<br>cancer                                 | Neoplasms |
| P35354 | Gestational<br>hypertension         | Cardiovascular<br>Diseases                                                  | Q07343 | Chronic<br>lymphocy<br>tic<br>leukemia             | Neoplasms |
| P35354 | Myocardial<br>infarction            | Cardiovascular<br>Diseases                                                  | Q16539 | Multiple<br>myeloma                                | Neoplasms |
| P35354 | Stroke                              | Cardiovascular<br>Diseases                                                  | P35354 | Malignant<br>mesotheli<br>oma                      | Neoplasms |
| P35367 | Hypotension                         | Cardiovascular<br>Diseases                                                  | P35367 | Acute<br>lymphobl<br>astic<br>leukaemia            | Neoplasms |
| P61073 | Multiple<br>Myeloma                 | Cardiovascular<br>Diseases                                                  | P35354 | Genitouri<br>nary<br>tumors                        | Neoplasms |
| Q16539 | Multiple<br>myeloma                 | Cardiovascular<br>Diseases                                                  | P35354 | Orophary<br>ngeal<br>squamous<br>cell<br>carcinoma | Neoplasms |
| Q16539 | Thrombosis                          | Cardiovascular<br>Diseases                                                  | P61073 | Prostate<br>cancer<br>(metastati<br>c)             | Neoplasms |
| P53779 | Ischemic<br>stroke                  | Cardiovascular<br>Diseases                                                  | P01375 | Solid<br>tumor                                     | Neoplasms |
| P01375 | Hyperimmuno<br>globulinemia<br>D    | Congenital,<br>Hereditary, and<br>Neonatal<br>Diseases and<br>Abnormalities | P05771 | B-lineage<br>malignanc<br>ies                      | Neoplasms |
| P35354 | Adenomatous                         | Congenital,                                                                 | P61073 | Late-stage                                         | Neoplasms |



|        |                            |                                                     |        |                            |                                    |
|--------|----------------------------|-----------------------------------------------------|--------|----------------------------|------------------------------------|
|        | polyposis                  | Hereditary, and Neonatal Diseases and Abnormalities |        | Solid tumors               |                                    |
| P35354 | Peutz-Jeghers syndrome     | Hereditary, and Neonatal Diseases and Abnormalities | P01375 | Hyperimmunoglobulinemia D  | Nervous System Diseases            |
| P01375 | Crohn's disease            | Digestive System Diseases                           | P28482 | Neurodegenerative diseases | Nervous System Diseases            |
| P20839 | Inflammatory bowel disease | Digestive System Diseases                           | P35354 | Alzheimer's disease        | Nervous System Diseases            |
| P29474 | Colon cancer               | Digestive System Diseases                           | P35354 | Carpal tunnel syndrome     | Nervous System Diseases            |
| P35354 | Adenomatous polyposis      | Digestive System Diseases                           | P35354 | Meningioma                 | Nervous System Diseases            |
| P35354 | Colorectal cancer          | Digestive System Diseases                           | P35354 | Stroke                     | Nervous System Diseases            |
| P35354 | Peutz-Jeghers syndrome     | Digestive System Diseases                           | P35367 | Epilepsy                   | Nervous System Diseases            |
| P45984 | Crohn's disease            | Digestive System Diseases                           | Q16539 | Alzheimer's disease        | Nervous System Diseases            |
| Q16539 | Crohn's disease            | Digestive System Diseases                           | P53779 | Ischemic stroke            | Nervous System Diseases            |
| P01375 | Diabetes Mellitus Type 2   | Endocrine System Diseases                           | P53779 | Neurological diseases      | Nervous System Diseases            |
| P05771 | Diabetes mellitus          | Endocrine System Diseases                           | P01375 | Diabetes Mellitus Type 2   | Nutritional and Metabolic Diseases |
| P05771 | Diabetic retinopathy       | Endocrine System Diseases                           | P01375 | Hyperimmunoglobulinemia D  | Nutritional and Metabolic Diseases |

|        |                               |                                                        |        |                                |                                             |
|--------|-------------------------------|--------------------------------------------------------|--------|--------------------------------|---------------------------------------------|
| P61073 | Ovarian cancer                | Endocrine System Diseases                              | P05771 | Diabetes mellitus              | Nutritional and Metabolic Diseases          |
| P01375 | Behcet's disease              | Eye Diseases                                           | P45984 | Obesity                        | Nutritional and Metabolic Diseases          |
| P05771 | Diabetic retinopathy          | Eye Diseases                                           | Q16539 | Insulin resistance             | Nutritional and Metabolic Diseases          |
| P05771 | Macular edema                 | Eye Diseases                                           | P01375 | Periodic fever syndrome        | Pathological Conditions, Signs and Symptoms |
| P35354 | Bladder cancer                | Female Urogenital Diseases and Pregnancy Complications | P35354 | Pyresis                        | Pathological Conditions, Signs and Symptoms |
| P35354 | Endometriosis                 | Female Urogenital Diseases and Pregnancy Complications | P35354 | Vascular lesion regression     | Pathological Conditions, Signs and Symptoms |
| P35354 | Gestational hypertension      | Female Urogenital Diseases and Pregnancy Complications | P35367 | Systemic arterial vasodilation | Pathological Conditions, Signs and Symptoms |
| P35354 | Renal cell carcinoma          | Female Urogenital Diseases and Pregnancy Complications | Q16539 | Cytokine-mediated diseases     | Pathological Conditions, Signs and Symptoms |
| P61073 | Ovarian cancer                | Female Urogenital Diseases and Pregnancy Complications | P01375 | Chronic inflammatory diseases  | Pathological Conditions, Signs and Symptoms |
| Q16539 | Crescentic glomerulonephritis | Female Urogenital Diseases and                         | P23219 | Chronic inflammatory           | Pathological Conditions, Signs and          |

|        |                                     |                          |     |        |                               |                                             |
|--------|-------------------------------------|--------------------------|-----|--------|-------------------------------|---------------------------------------------|
|        |                                     | Pregnancy Complications  |     |        | diseases                      | Symptoms                                    |
| P01375 | Hyperimmunoglobulinemia D           | Hemic Lymphatic Diseases | and | P35354 | Inflammatory diseases         | Pathological Conditions, Signs and Symptoms |
| P27815 | Chronic lymphocytic leukemia        | Hemic Lymphatic Diseases | and | P35367 | Intimal hyperplasia           | Pathological Conditions, Signs and Symptoms |
| P61073 | Non-Hodgkin's Lymphoma              | Hemic Lymphatic Diseases | and | P35367 | Nausea and vomiting           | Pathological Conditions, Signs and Symptoms |
| Q07343 | Chronic lymphocytic leukemia        | Hemic Lymphatic Diseases | and | P29474 | Inflammation                  | Pathological Conditions, Signs and Symptoms |
| P28482 | Proliferative diseases              | Hemic Lymphatic Diseases | and | P29474 | Sepsis                        | Pathological Conditions, Signs and Symptoms |
| P35367 | Acute lymphoblastic leukaemia       | Hemic Lymphatic Diseases | and | P35228 | Ischemia reperfusion injuries | Pathological Conditions, Signs and Symptoms |
| P01375 | Hyperimmunoglobulinemia D           | Immune System Diseases   |     | P35354 | Dysmenorrhea                  | Pathological Conditions, Signs and Symptoms |
| P27815 | Chronic lymphocytic leukemia        | Immune System Diseases   |     | P35354 | Inflammation                  | Pathological Conditions, Signs and Symptoms |
| P35367 | Seasonal allergic rhinitis          | Immune System Diseases   |     | P35354 | Pain                          | Pathological Conditions, Signs and Symptoms |
| P61073 | Acquired Immune Deficiency Syndrome | Immune System Diseases   |     | P35354 | Pathological angiogenesis     | Pathological Conditions, Signs and Symptoms |
| P61073 | HIV Infection                       | Immune System Diseases   |     | P35367 | Ischemia                      | Pathological Conditions,                    |



|        |                               |      |                          |        |                                     |                                     |
|--------|-------------------------------|------|--------------------------|--------|-------------------------------------|-------------------------------------|
|        |                               |      |                          |        |                                     | Diseases                            |
| P35354 | Renal carcinoma               | cell | Male Urogenital Diseases | P23008 | Acute nasopharyngitis               | Respiratory Tract Diseases          |
| Q02750 | Prostate cancer               |      | Male Urogenital Diseases | P35354 | Lung cancer                         | Respiratory Tract Diseases          |
| P61073 | Prostate cancer (metastatic)  |      | Male Urogenital Diseases | P35367 | Seasonal allergic rhinitis          | Respiratory Tract Diseases          |
| Q16539 | Crescentic glomerulonephritis |      | Male Urogenital Diseases | Q07343 | Asthma                              | Respiratory Tract Diseases          |
| P29474 | Schizophrenia                 |      | Mental Disorders         | Q08499 | Asthma                              | Respiratory Tract Diseases          |
| P35354 | Alzheimer's disease           |      | Mental Disorders         | Q16539 | Adult respiratory distress syndrome | Respiratory Tract Diseases          |
| P35367 | Anxiety disorder              |      | Mental Disorders         | P35367 | Chronic urticaria                   | Skin and Connective Tissue Diseases |
| Q16539 | Alzheimer's disease           |      | Mental Disorders         | P01375 | Behcet's disease                    | Skin and Connective Tissue Diseases |
| O14684 | Rheumatoid arthritis          |      | Musculoskeletal Diseases | P35354 | Breast cancer                       | Skin and Connective Tissue Diseases |
| P01375 | Rheumatic diseases            |      | Musculoskeletal Diseases | P35354 | Peutz-Jeghers syndrome              | Skin and Connective Tissue Diseases |
| P01375 | Rheumatoid arthritis          |      | Musculoskeletal Diseases | P61073 | Breast cancer                       | Skin and Connective Tissue Diseases |
| P35354 | Arthritis                     |      | Musculoskeletal Diseases | Q02750 | Breast cancer                       | Skin and Connective Tissue Diseases |

|        |                              |                          |        |                                     |                                     |
|--------|------------------------------|--------------------------|--------|-------------------------------------|-------------------------------------|
| P35354 | Osteoarthritis               | Musculoskeletal Diseases | Q16539 | Psoriasis                           | Skin and Connective Tissue Diseases |
| P35354 | Rheumatoid arthritis         | Musculoskeletal Diseases | Q16539 | Skin diseases                       | Skin and Connective Tissue Diseases |
| Q16539 | Rheumatoid arthritis         | Musculoskeletal Diseases | P01375 | Behcet's disease                    | Stomatognathic Diseases             |
| P12268 | Leukemia                     | Neoplasms                | P35367 | Epidermal hyperplasia               | Virus Diseases                      |
| P17252 | Leukemia                     | Neoplasms                | P63231 | Influenza                           | Virus Diseases                      |
| P17252 | Prostate cancer              | Neoplasms                | P03437 | Influenza A virus infection         | Virus Diseases                      |
| P27815 | Chronic lymphocytic leukemia | Neoplasms                | P23008 | Acute nasopharyngitis               | Virus Diseases                      |
| P29474 | Colon cancer                 | Neoplasms                | P23526 | Viral infection                     | Virus Diseases                      |
| P35354 | Adenomatous polyposis        | Neoplasms                | P61073 | Acquired Immune Deficiency Syndrome | Virus Diseases                      |
| P35354 | Bladder cancer               | Neoplasms                | P61073 | HIV Infection                       | Virus Diseases                      |
| P35354 | Breast cancer                | Neoplasms                | P35354 | Carpal tunnel syndrome              | Wounds and Injuries                 |

---
